# Supplementary material
Source: MDPI journal article supplement (https://www.mdpi.com/1424-8247/16/3/388)
Supplement: s1 [file s1]

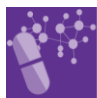

## Supplementary Materials

# Preparation and Characterization of Amorphous Solid Dispersions for the Solubilization of Fenretinide

Guendalina Zuccari <sup>1,\*</sup>, Eleonora Russo <sup>1</sup>, Carla Villa <sup>1</sup>, Alessia Zorzoli <sup>2</sup>, Danilo Marimpietri <sup>2</sup>, Leonardo Marchitto <sup>3</sup>, and Silvana Alfei <sup>1</sup>

<sup>1</sup> Department of Pharmacy (DiFAR), University of Genoa, Viale Cembrano 4, I-16148, Genova, Italy,

<sup>2</sup> Cell Factory, IRCCS Istituto Giannina Gaslini, Via Gerolamo Gaslini 5, I-16147 Genova,

<sup>3</sup> Department of Sciences for the Quality of Life, University of Bologna, Corso D'Augusto 237, I-47921 Rimini, Italy

\* Correspondence: guendalina.zuccari@unige.it

## Section S1. Figure S1-S5.

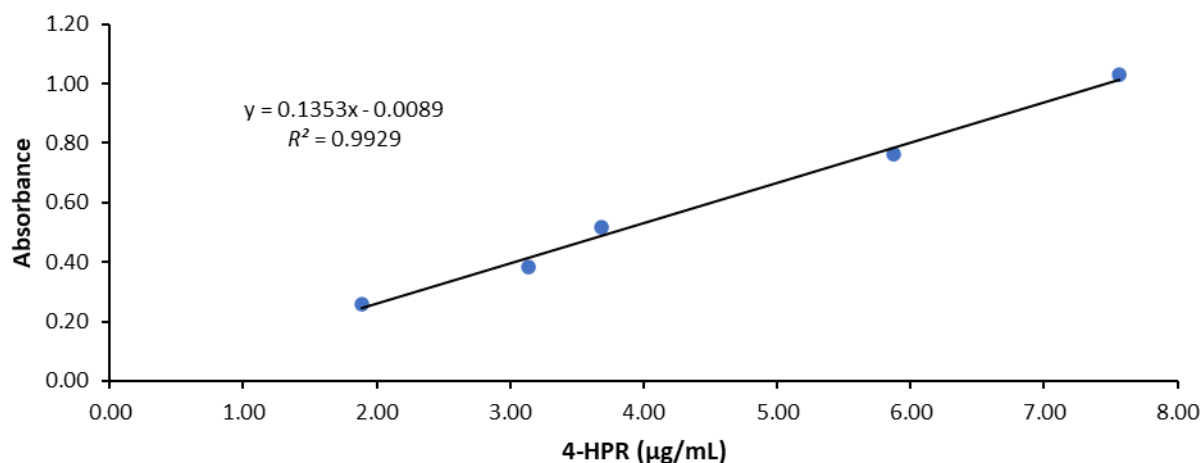

**Figure S1.** 4-HPR calibration curve in methanol at  $\lambda_{\text{max}} = 364$  nm using an UV-Vis spectrophotometer.

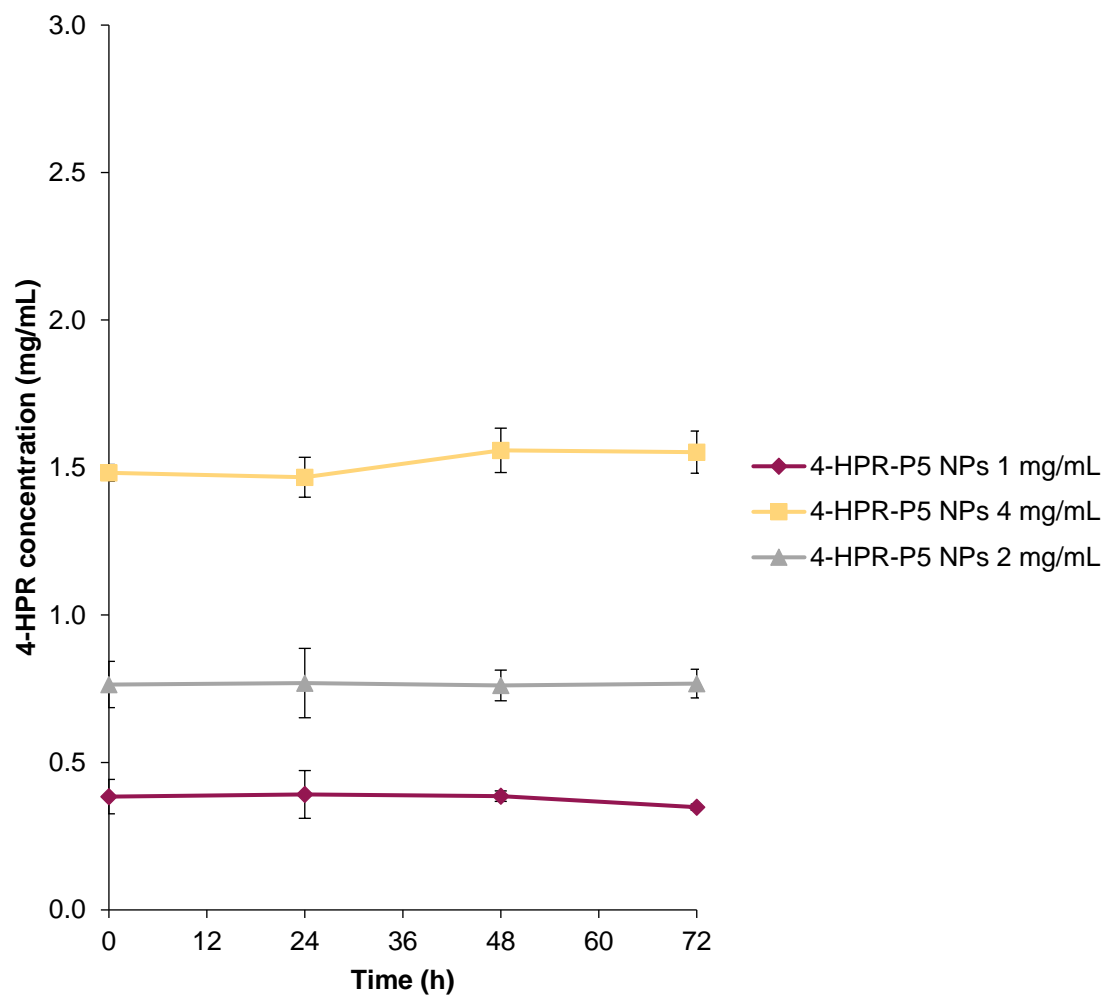

**Figure S2.** Stability over time of aqueous nanoparticle dispersions at different concentrations (1,2,4 mg/mL) maintained at 25 °C. Data of the apparent 4-HPR solubility over time are reported as the mean  $\pm$  standard deviation (S.D.) of three independent experiments.

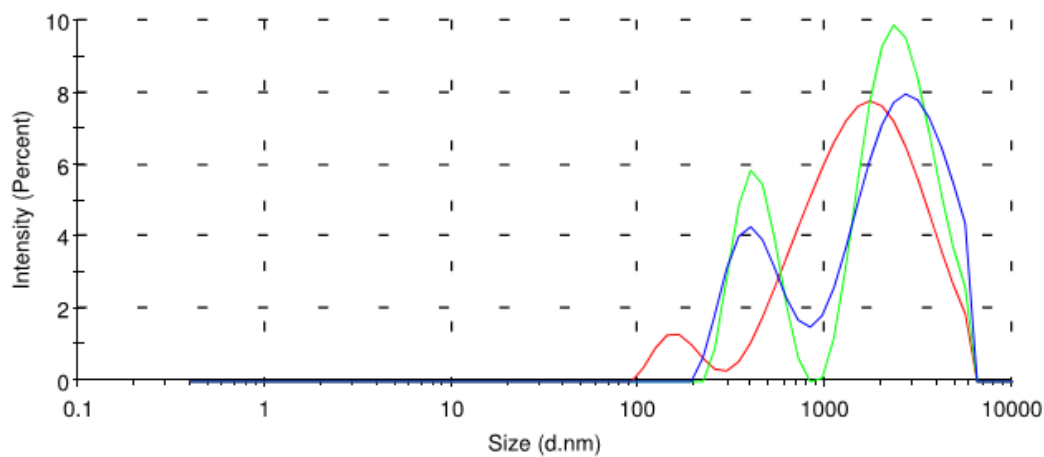

**Figure S3.** Representative size distribution of P5 recorded in water at 25°C.

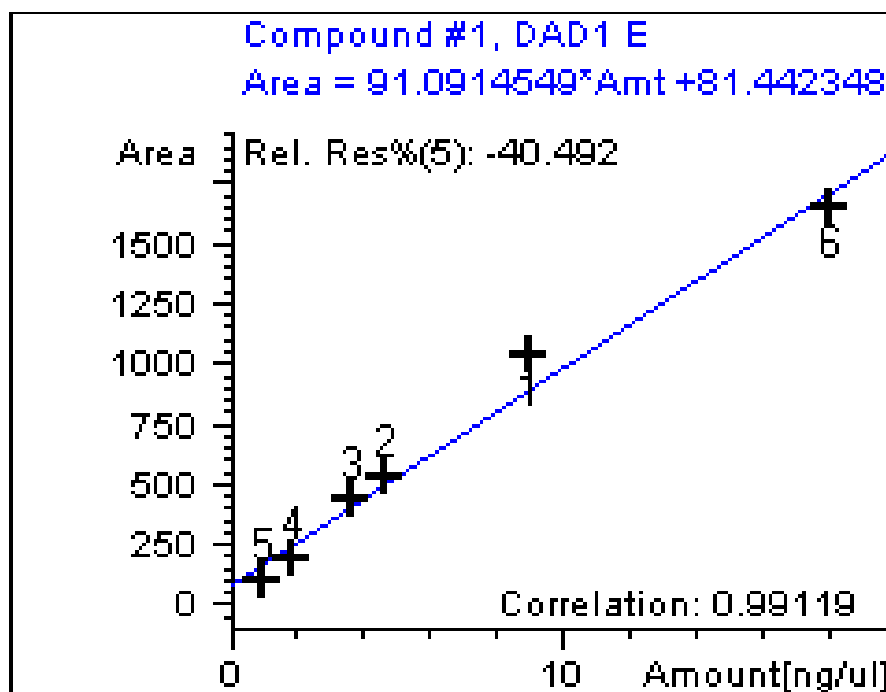

**Figure S4.** 4-HPR calibration curve using RP-HPLC DAD C<sub>18</sub> (5  $\mu$ m) reverse-phase column (150 mm  $\times$  4.6 mm). Mobile phase: isocratic elution with acetonitrile/water/glacial acetic acid (80/18/2 v/v/v) delivered at 1 mL/min. Absorbance detector set at  $\lambda_{\text{max}}$  = 260 nm.

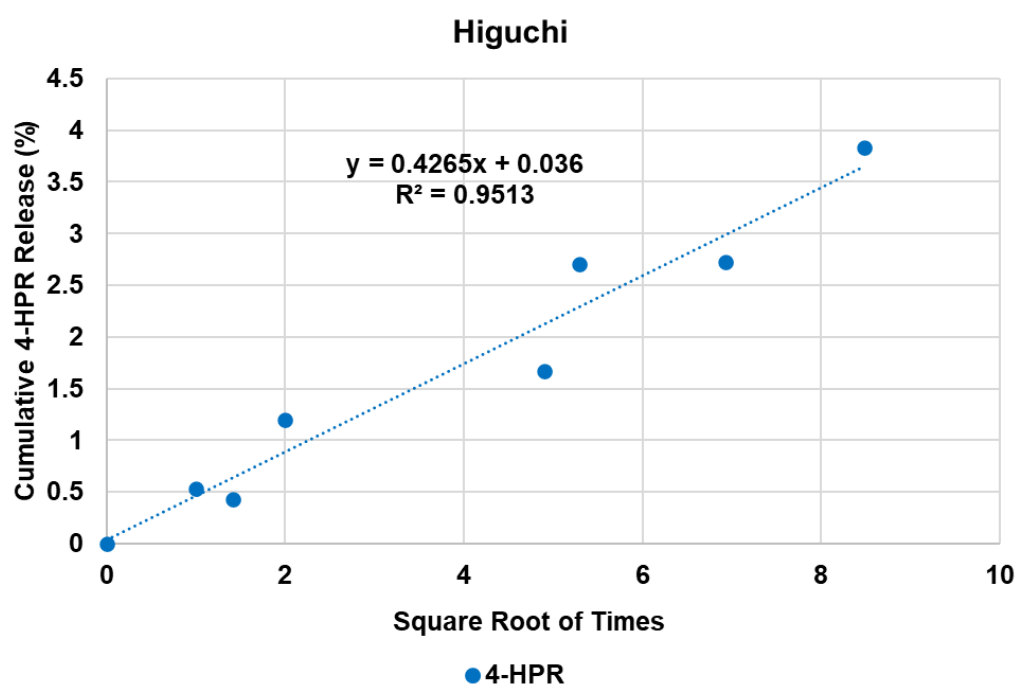

**Figure S5.** Linear regression of Higuchi mathematical kinetic model with the related equation and  $R^2$  value.
